# Supplementary material
Source: Elsevier journal article supplement (https://www.sciencedirect.com/science/article/pii/S2174204920302014)
Supplement: mmc1 [file S2174204920302014:mmc1.pdf]

## Material suplementar

**Suplemento 1.** Legislação sobre testes genéticos.

**Suplemento 2.** Testes genéticos.

**Suplemento 3.** Genes citados ao longo documento.

**Suplemento 4.** Lista de abreviaturas usadas ao longo documento.

**Suplemento 5.** Níveis de recomendação.

**Suplemento 6.** Canalopatias.

**Suplemento 7.** Manifestações cardíacas e extra-cardíacas de fenocópias da miocardiopatia hipertrófica.

**Suplemento 8.** Diagnóstico de miocardiopatia dilatada em familiares.

**Suplemento 9.** Manifestações sugestivas de doença genética/rara na miocardiopatia dilatada.

**Suplemento 10.** Diagnóstico de miocardiopatia arritmogénica do ventrículo direito.

**Suplemento 11.** Diagnósticos diferenciais a considerar na miocardiopatia restritiva.

**Suplemento 12.** Diagnóstico de não-compactação do ventrículo esquerdo.

**Suplemento 13.** Rastreio familiar nas miocardiopatias.

**Suplemento 14.** Aortopatias hereditárias.

**Suplemento 15.** Cardiopatias congénitas.

## SUPLEMENTO 1. Diário da República - I série-A (nº18 de 26 de Janeiro de 2005)

### ARTIGO 6.º INFORMAÇÃO GENÉTICA

- 1- A informação genética é a informação de saúde que verse as características hereditárias de uma ou de várias pessoas, aparentadas entre si ou com características comuns daquele tipo, excluindo-se desta definição a informação derivada de testes de parentesco ou estudos de zigotia em gémeos, dos estudos de identificação genética para fins criminais, bem como do estudo das mutações genéticas somáticas no cancro.
- 2- A informação genética pode ser resultado da realização de testes genéticos por meios de biologia molecular, mas também de testes citogenéticos, bioquímicos, fisiológicos ou imagiológicos, ou da simples recolha de informação familiar, registada sob a forma de uma árvore familiar ou outra, cada um dos quais pode, por si só, enunciar o estatuto genético de uma pessoa e seus familiares.
- 3- A informação genética reveste natureza médica apenas quando se destina a ser utilizada nas prestações de cuidados ou tratamentos de saúde, no contexto da confirmação ou exclusão de um diagnóstico clínico, no contexto de diagnóstico pré-natal ou diagnóstico pré-implantatório ou no da farmacogenética, excluindo-se, pois, a informação de testes preditivos para predisposições a doenças comuns e pré-sintomáticos para doenças monogénicas.
- 4- A informação genética que não tenha implicações imediatas para o estado de saúde actual, tal como a resultante de testes de paternidade, de estudos de zigotia em gémeos, e a de testes preditivos - com a excepção de testes genéticos para resposta a medicamentos -, de heterozigotia, pré-sintomáticos, pré-natais ou pré-implantatórios não pode ser incluída no processo clínico, salvo no caso de consultas ou serviços de genética médica com arquivos próprios e separados.
- 5- Os processos clínicos de consultas ou serviços de genética médica não podem ser acedidos, facultados ou consultados por médicos, outros profissionais de saúde ou funcionários de outros serviços da mesma instituição ou outras instituições do sistema de saúde no caso de conterem informação genética sobre pessoas saudáveis.
- 6- A informação genética deve ser objecto de medidas legislativas e administrativas de protecção reforçada em termos de acesso, segurança e confidencialidade.
- 7- A utilização de informação genética é um acto entre o seu titular e o

médico, que é sujeito às regras deontológicas de sigilo profissional dos médicos e dos restantes profissionais de saúde.

- 8- A existência de vínculo laboral ou outro entre o médico ou outro profissional de saúde e qualquer actividade, incluindo companhias de seguros, entidades profissionais ou fornecedores de quaisquer bens ou serviços, não justifica qualquer diminuição aos deveres de segredo que sobre aqueles impendem.
- 9- Os cidadãos têm o direito de saber se um processo clínico, ficheiro ou registo médico ou de investigação contém informação genética sobre eles próprios e a sua família e de conhecer as finalidades e usos dessa informação, a forma como é armazenada e os prazos da sua conservação.

#### ARTIGO 9.º TESTES GENÉTICOS

- 1- A realização de testes genéticos diagnósticos ou de farmacogenética obedece aos princípios que regem a prestação de qualquer cuidado de saúde.
- 2- A detecção do estado de heterozigotia para doenças recessivas, o diagnóstico pré-sintomático de doenças monogénicas e os testes de susceptibilidades genéticas em pessoas saudáveis só podem ser executados com autorização do próprio, a pedido de um médico com a especialidade de genética e na sequência da realização de consulta de aconselhamento genético, após consentimento informado, expresso por escrito.
- 3- A comunicação dos resultados de testes genéticos deve ser feita exclusivamente ao próprio, ou, no caso de testes diagnósticos, a quem legalmente o represente ou seja indicado pelo próprio, e em consulta médica apropriada.
- 4- No caso de testes de estado de heterozigotia, pré-sintomáticos e preditivos, os resultados devem ser comunicados ao próprio e não podem nunca ser comunicados a terceiros sem a sua autorização expressa por escrito, incluindo a médicos ou outros profissionais de saúde de outros serviços ou instituições ou da mesma consulta ou serviço mas não envolvidos no processo de teste dessa pessoa ou da sua família.
- 5- No caso de testes pré-natais e pré-implantatórios, os resultados devem ser comunicados exclusivamente à progenitora, aos progenitores ou aos respectivos representantes legais.
- 6- Não devem ser realizados testes pré-sintomáticos, preditivos ou pré-implantatórios em pessoas com incapacidade mental que possam não compreender as implicações deste tipo de testes e dar o seu consentimento.

- 7- Em situações de risco para doenças de início na vida adulta e sem cura nem tratamento comprovadamente eficaz, a realização do teste pré-sintomático ou preditivo tem ainda como condição uma avaliação psicológica e social prévia e o seu seguimento após a entrega dos resultados do teste.
- 8- A frequência das consultas de aconselhamento genético e a forma do seguimento psicológico e social são determinadas considerando a gravidade da doença, a idade mais habitual de manifestação dos primeiros sintomas e a existência ou não de tratamento comprovado.

#### ARTIGO 10.º TESTES DE HETEROZIGOTIA, PRÉ-SINTOMÁTICOS, PREDITIVOS E PRÉ-NATAIS

- 1- Para efeitos do artigo anterior, consideram-se testes para detecção do estado de heterozigotia os que permitam a detecção de pessoas saudáveis portadoras heterozigóticas para doenças recessivas.
- 2- Consideram-se testes pré-sintomáticos os que permitam a identificação da pessoa como portadora, ainda assintomática, do genótipo inequivocamente responsável por uma dada doença monogénica.
- 3- Consideram-se testes genéticos preditivos os que permitam a detecção de genes de susceptibilidade, entendida como uma predisposição genética para uma dada doença com hereditariedade complexa e com início habitualmente na vida adulta.
- 4- Consideram-se testes de farmacogenética os testes preditivos que permitem a detecção de predisposições para respostas diferenciais no tratamento com um dado medicamento ou a susceptibilidade para reacções adversas derivadas da toxicidade da droga.
- 5- Consideram-se testes pré-natais todos aqueles executados antes ou durante uma gravidez, com a finalidade de obtenção de informação genética sobre o embrião ou o feto, considerando-se assim como caso particular destes o diagnóstico pré-implantatório.
- 6- Consideram-se testes de rastreio todos os testes diagnósticos, de heterozigotia, pré-sintomáticos, preditivos ou pré-natais que são aplicados a toda a população ou grupos populacionais de risco aumentado, nomeadamente por género, idade, origem étnica, em qualquer altura da vida.

#### ARTIGO 17.º DEVER DE PROTECÇÃO

- 1- É ilícita a criação de qualquer lista de doenças ou características genéticas que possa fundamentar pedidos de testes de diagnóstico, de heterozigotia, pré-

sintomáticos, preditivos ou pré-natais ou de qual-quer tipo de rastreio genético.

- 2- Todo o cidadão tem direito a recusar-se a efectuar um teste genético do estado de heterozigotia, pré-sintomático, preditivo ou pré-natal.
- 3- Todo o cidadão tem direito a receber aconselhamento genético e, se indicado, acompanhamento psicossocial, antes e depois da realização de testes de heterozigotia, pré-sintomáticos, preditivos e pré-natais.
- 4- Só podem ser pedidos testes genéticos a menores desde que sejam efectuados em seu benefício e nunca em seu prejuízo, com o consentimento informado dos seus pais ou tutores, mas procurando-se sempre o seu próprio consentimento.
- 5- Nomeadamente, não podem ser pedidos testes preditivos em menores para doenças de início habitual na vida adulta, sem prevenção ou cura comprovadamente eficaz.
- 6- Do mesmo modo, o diagnóstico pré-natal para doenças de início habitual na vida adulta e sem cura não pode ser efectuado para mera informação dos pais, mas apenas para prevenção da doença ou deficiência, dentro dos prazos previstos na lei.
- 7- Os médicos têm o dever de informar as pessoas que os consultam sobre os mecanismos de transmissão e os riscos que estes implicam para os seus familiares e de os orientar para uma consulta de genética médica, a qual deve ser assegurada nos termos da legislação regulamentar da presente lei.
- 8- No caso dos testes de rastreio genético, deve sempre proteger-se, além dos direitos individuais, os direitos das populações ou grupos populacionais a rastrear, evitando-se a sua estigmatização.
- 9- Os cidadãos com necessidades especiais, bem como os que são portadores de deficiências ou doenças crónicas, incluindo os doentes com patologias genéticas e seus familiares, gozam do direito à protecção do Estado em matéria de informação sobre os cuidados de saúde de que necessitam.

## SUPLEMENTO 2. Testes genéticos.

Existem diversos tipos de testes genéticos, desde o clássico cariótipo, técnicas de citogenética como FISH (*Fluorescence In Situ Hybridization*), arrayCGH (*Comparative Genomic Hybridization*) com objetivo de detetar desequilíbrios genómicos (deleções/duplicações genómicas), as técnicas moleculares como MLPA (*Multiplex Ligation-dependent Probe Amplification*) para deteção de deleções/duplicações génicas e sequenciação de Sanger ou NGS (*Next Generation Sequencing*) para deteção de mutações pontuais (*silent, missense, nonsense, frameshift e splicing*).

A técnica de NGS veio permitir a investigação mais abrangente e custo-eficaz de diversas patologias através do estudo em simultâneo de múltiplos genes, aumentando assim a taxa de diagnóstico, mas, em contraponto, veio originar situações de difícil aconselhamento genético, em particular pelo aumento da deteção de variantes de significado incerto.

## SUPLEMENTO 3. Genes citados ao longo documento.

| Gene            | Proteína                                                                          |
|-----------------|-----------------------------------------------------------------------------------|
| <i>ABCG5</i>    | Esterolina 1                                                                      |
| <i>ABCG8</i>    | Esterolina 2                                                                      |
| <i>ACTA2</i>    | $\alpha 2$ actina                                                                 |
| <i>ACVRL1</i>   | Recetor activina A, tipo II- <i>like</i> 1                                        |
| <i>APOB</i>     | Apolipoproteína B                                                                 |
| <i>APOE</i>     | Apolipoproteína E                                                                 |
| <i>AQP1</i>     | Aquaporina 1                                                                      |
| <i>ATP13A3</i>  | ATPase tipo 13A3                                                                  |
| <i>BMPR2</i>    | Recetor da proteína óssea morfogenética tipo II                                   |
| <i>CACNA1C</i>  | Subunidade $\alpha 1$ do canal de cálcio, dependente da voltagem, tipo L          |
| <i>CACNA2D1</i> | Subunidade $\alpha 2/\delta 1$ do canal de cálcio, dependente da voltagem, tipo L |
| <i>CACNB2b</i>  | Subunidade $\beta 2B$ do canal de cálcio, dependente da voltagem                  |
| <i>CASQ2</i>    | Calsequestrina 2                                                                  |
| <i>CAV1</i>     | Caveolina 1                                                                       |
| <i>COL3A1</i>   | Cadeia $\alpha 1$ do colagénio tipo III                                           |
| <i>DSC2</i>     | Desmocolina 2                                                                     |
| <i>DSG2</i>     | Desmogleina 2                                                                     |
| <i>DSP</i>      | Desmoplaquina                                                                     |
| <i>EIF2AK4</i>  | <i>Eukaryotic translation initiation factor 2 Alpha Kinase 4</i>                  |
| <i>ELN</i>      | Elastina                                                                          |
| <i>ENG</i>      | Endogлина                                                                         |
| <i>FBLN4</i>    | Fibulina 4                                                                        |
| <i>FBLN5</i>    | Fibulina 5                                                                        |
| <i>FBN1</i>     | Fibrilina 1                                                                       |
| <i>GDF2</i>     | Fator de crescimento/diferenciação 2                                              |
| <i>JUP</i>      | Placoglobina da junção                                                            |
| <i>KCNE1</i>    | Canal de potássio, dependente da voltagem, subfamília E, subunidade reguladora 1  |
| <i>KCNH2</i>    | Canal de potássio, dependente da voltagem, subfamília H, membro 2                 |
| <i>KCNJ2</i>    | Canal de potássio, retificador, subfamília J, membro 2                            |

|                |                                                                                   |
|----------------|-----------------------------------------------------------------------------------|
| <i>KCNK3</i>   | Canal de potássio, subfamília k, membro 3                                         |
| <i>KCNQ1</i>   | Canal de potássio, dependente da voltagem, subfamília KQT- <i>like</i> , membro 1 |
| <i>LDLR</i>    | Recetor da lipoproteína de baixa densidade                                        |
| <i>LDLRAP1</i> | Proteína adaptadora ao recetor da lipoproteína de baixa densidade de tipo 1       |
| <i>LIPA</i>    | Lípase A                                                                          |
| <i>LMNA</i>    | Lamina A/C                                                                        |
| <i>MAT2A</i>   | $\alpha$ metionina-adenosiltransferase II                                         |
| <i>MFAP5</i>   | Proteína associada a microfibrilas 5                                              |
| <i>MILK</i>    | Cínase da cadeia leve da miosina                                                  |
| <i>MYBPC</i>   | Proteína C de ligação à miosina                                                   |
| <i>MYH7</i>    | Cadeia pesada da $\beta$ -miosina, músculo cardíaco                               |
| <i>MYH11</i>   | Cadeia pesada da miosina do músculo liso                                          |
| <i>NOTCH1</i>  | <i>Notch, Drosophila, homolog of</i>                                              |
| <i>PKP2</i>    | Placofilina 2                                                                     |
| <i>PRKAG2</i>  | Proteína cínase, ativada por AMP, não catalítica, $\gamma 2$                      |
| <i>PRKG1</i>   | Proteína cínase, dependente de GMPc, reguladora, tipo I                           |
| <i>PSCK9</i>   | Pró-proteína convertase subtilisina/kexina tipo 9                                 |
| <i>RYR2</i>    | Recetor rianodínico 2                                                             |
| <i>SCN5A</i>   | Subunidade $\alpha$ do canal de sódio, dependente da voltagem, tipo V             |
| <i>SCN10A</i>  | Subunidade $\alpha$ do canal de sódio, dependente da voltagem, tipo X             |
| <i>SLC2A10</i> | Família de transportadores de solutos 2, membro 10                                |
| <i>SKI</i>     | <i>V-SKI avian sarcoma viral oncogene homolog</i>                                 |
| <i>SMAD3</i>   | <i>Mothers against decapentaplegic homolog 3</i>                                  |
| <i>SMAD9</i>   | <i>Mothers against decapentaplegic homolog 9</i>                                  |
| <i>SOX17</i>   | <i>SRY-Box 17</i>                                                                 |
| <i>TBX4</i>    | <i>T-Box 4</i>                                                                    |
| <i>TBX5</i>    | <i>T-Box 5</i>                                                                    |
| <i>TGFB2</i>   | Fator de transformação do crescimento $\beta 2$                                   |
| <i>TGFB3</i>   | Fator de transformação do crescimento $\beta 3$                                   |
| <i>TGFBR1</i>  | Recetor de tipo 1 do fator de transformação do crescimento $\beta$                |
| <i>TGFBR2</i>  | Recetor de tipo 2 do fator de transformação do crescimento $\beta$                |
| <i>TMEM43</i>  | Proteína transmembranar 43                                                        |
| <i>TNNI3</i>   | Troponina I                                                                       |



|              |                      |
|--------------|----------------------|
| <i>TNNT2</i> | Troponina T cardíaca |
| <i>TPM1</i>  | Tropomiosina 1       |

#### SUPLEMENTO 4. Lista de abreviaturas usadas ao longo documento.

|                                                                   |                                                  |
|-------------------------------------------------------------------|--------------------------------------------------|
| <sup>18</sup> F-FDG = 18-fluorodesoxiglicose                      | CSVD = câmara de saída do ventrículo direito     |
| 99m Tc-DPD = tecnécio 99 m - ácido difosfono-propanodicarboxílico | DP = desvio-padrão                               |
| AD = autossômico dominante                                        | ECG = eletrocardiograma                          |
| ADN = ácido desoxirribonucleico                                   | ETE = ecocardiograma transesofágico              |
| AR = autossômico recessivo                                        | ETT = ecocardiograma transtorácico               |
| BCRE = bloqueio completo de ramo esquerdo                         | FA = fibrilhação auricular                       |
| BEM = biópsia endomiocárdica                                      | FC = frequência cardíaca                         |
| BRE = bloqueio de ramo esquerdo                                   | FEVE = fração de ejeção do ventrículo esquerdo   |
| CC = cardiopatias congénitas                                      | FEVD = fração de ejeção do ventrículo direito    |
| CGH = <i>comparative genomic hybridization</i>                    | FISH = <i>fluorescence in situ hybridization</i> |
| CK = creatinocínase                                               | MHND = miocardiopatia hipocinética não dilatada  |
| FLA = flutter auricular                                           | MNC = miocardiopatia não-compactada              |
| FV = fibrilhação ventricular                                      | MS = morte súbita                                |
| HAP = hipertensão arterial pulmonar                               | MSC = morte súbita cardíaca                      |
| HF = hipercolesterolemia familiar                                 | NCVE = não-compactação do ventrículo esquerdo    |
| MLPA = <i>multiplex ligation-dependent probe amplification</i>    | NGS = <i>next generation sequencing</i>          |
| MAVD = miocardiopatia arritmogénica do ventrículo direito         | PEEC = para-esternal eixo curto                  |
| MCD = miocardiopatia dilatada                                     | PEEL = para-esternal eixo-longo                  |
| MCH = miocardiopatia hipertrófica                                 | PET = tomografia de emissão de positrões         |
| MCR = miocardiopatia restritiva                                   |                                                  |

PVM = prolapso da válvula mitral

RMC = ressonância magnética cardíaca

SADS = *sudden arrhythmic death syndrome*)

SBr = síndrome de Brugada

SM = síndrome de Marfan

SQTC = síndrome do QT curto

SQTL = síndrome do QT longo

SRP = síndrome de repolarização precoce

TC = tomografia computadorizada

TV = taquicardia ventricular

TVNS = taquicardia ventricular não-sustentada

TVPC = taquicardia ventricular polimórfica catecolaminérgica

VD = ventrículo direito

VE = ventrículo esquerdo

VETD = ventrículo esquerdo em telediástole

VSI = variantes de significado incerto

VTD = volume telediastólico

## SUPLEMENTO 5. Níveis de recomendação.

- Classe I - o teste genético é recomendado; Classe IIa - o teste genético pode ser útil/deve ser considerado; Classe IIb - o teste genético pode ser considerado; Classe III - o teste genético não está recomendado.
- Nível A - a avaliação / teste genético tem elevada correlação com a doença de interesse em estudos de moderada ou grande dimensão; Nível B - a avaliação / teste genético tem elevada correlação com a doença de interesse em estudos de pequena dimensão ou de um centro único; Nível C - a avaliação / teste genético tem correlação com a doença de interesse em casos clínicos.

## SUPLEMENTO 6. Canalopatias.

Tabela S1. Score de Shanghai proposto para o diagnóstico da síndrome de Brugada.(8)<sup>#</sup>

| CRITÉRIOS          |                                                                                                          | PONTOS |
|--------------------|----------------------------------------------------------------------------------------------------------|--------|
| I.                 | ECG (12-derivações/Holter) <sup>*§</sup>                                                                 |        |
|                    | a) Padrão tipo 1 espontâneo                                                                              | 3,5    |
|                    | b) Padrão tipo 1 induzido pela febre                                                                     | 3      |
|                    | c) Padrão tipo 1 induzido em testes de provocação                                                        | 2      |
| II.                | História clínica*                                                                                        |        |
|                    | a) Paragem cardíaca inexplicada ou FV / TV polimórfica documentada                                       | 3<br>2 |
|                    | b) Respiração agónica noturna                                                                            | 2      |
|                    | c) Suspeita de síncope arritmica                                                                         | 1      |
|                    | d) Síncope de etiologia / mecanismo não esclarecido                                                      | 0,5    |
|                    | e) FA/FLA em pacientes < 30 anos, sem etiologia alternativa                                              |        |
| III.               | História familiar*                                                                                       |        |
|                    | a) Familiares de 1º ou 2º grau com diagnóstico definitivo de SBr                                         | 2<br>1 |
|                    | b) MSC suspeita em familiares de 1º ou 2º grau (noturna, na presença de febre ou fármacos precipitantes) | 0,5    |
|                    | c) MSC inexplicada < 45 anos em familiares de 1º ou 2º grau com autópsia negativa                        |        |
| IV.                | Resultado teste genético                                                                                 |        |
|                    | a) Presença de variante provavelmente patogénica num gene de suscetibilidade para SBr                    | 0,5    |
| SCORE <sup>§</sup> |                                                                                                          |        |
|                    | ▪ SBr provável /definitiva                                                                               | ≥ 3,5  |
|                    | ▪ SBr possível                                                                                           | 2-3    |
|                    | ▪ Não-diagnóstico                                                                                        | < 2    |

<sup>#</sup> Este score carece ainda de avaliação prospetiva e validação. <sup>\*</sup>contabilizar o critério com maior pontuação; <sup>§</sup> para o diagnóstico é obrigatória a presença de um critério eletrocardiográfico. ECG - eletrocardiograma; FA - fibrilhação auricular; FLA - flutter

auricular; FV - fibrilhação ventricular; MSC - morte súbita cardíaca; SBr - síndrome de Brugada; TV - taquicardia ventricular.

**Tabela S2.** Score de Shanghai proposto para o diagnóstico da síndrome de repolarização precoce.(8)<sup>#</sup>

| CRITÉRIOS                  |                                                                                                                                    | PONTOS   |
|----------------------------|------------------------------------------------------------------------------------------------------------------------------------|----------|
| <b>I.</b>                  | <b>História clínica*</b>                                                                                                           |          |
| a)                         | Paragem cardíaca inexplicada ou FV / TV polimórfica documentada                                                                    | 3        |
| b)                         | Suspeita de síncope arritmica                                                                                                      | 2        |
| c)                         | Síncope de etiologia / mecanismo não esclarecido                                                                                   | 1        |
| <b>II.</b>                 | <b>ECG de 12-derivações*§</b>                                                                                                      |          |
| a)                         | Padrão de repolarização precoce $\geq 0,2$ mV em $\geq 2$ derivações inferiores e/ou laterais e segmento ST horizontal/descendente | 2        |
| b)                         | Alterações dinâmicas na elevação do ponto J ( $\geq 0,1$ mV) em $\geq 2$ derivações inferiores e/ou laterais                       | 1,5      |
| c)                         | Elevação do ponto J $\geq 0,1$ mV, em $\geq 2$ derivações inferiores e/ou laterais                                                 | 1        |
| <b>III.</b>                | <b>Holter</b>                                                                                                                      |          |
| a)                         | Extrassístoles ventriculares com intervalo de acoplamento curto (com onda R sobre o ramo ascendente ou pico da onda T)             | 2        |
| <b>IV.</b>                 | <b>História familiar*</b>                                                                                                          |          |
| a)                         | Familiar com diagnóstico definitivo de SRP                                                                                         | 2        |
| b)                         | $\geq 2$ familiares de 1º grau com padrão de repolarização precoce (critério II.a)                                                 | 2        |
| c)                         | Um familiar de 1º grau com padrão de repolarização precoce (critério II.a)                                                         | 1        |
| d)                         | MS inexplicada < 45 anos em familiares de 1º ou 2º grau                                                                            | 0,5      |
| <b>V.</b>                  | <b>Resultado teste genético</b>                                                                                                    |          |
| a)                         | Presença de variante provavelmente patogénica num gene de suscetibilidade para SRP                                                 | 0,5      |
| <b>SCORE<sup>§</sup></b>   |                                                                                                                                    |          |
| ▪ SRP provável /definitivo |                                                                                                                                    | $\geq 5$ |

|                   |       |
|-------------------|-------|
| ▪ SRP possível    | 3-4,5 |
| ▪ Não-diagnóstico | < 3   |

# Este *score* carece ainda de avaliação prospectiva e validação. \*contabilizar o critério com maior pontuação; § para o diagnóstico é obrigatória a presença de um critério eletrocardiográfico. ECG - eletrocardiograma; FV - fibrilhação ventricular; MS - morte súbita; SRP - síndrome de repolarização precoce; TV - taquicardia ventricular.

**Tabela S3.** *Score* de risco da síndrome do QT longo. (12)

|                                                                   | PONTOS |
|-------------------------------------------------------------------|--------|
| <b>I. Achados eletrocardiográficos*</b>                           |        |
| a) QTc <sup>§</sup>                                               |        |
| ≥ 480 ms**                                                        | 3      |
| 460-479 ms                                                        | 2      |
| 450-459 ms (nos homens)                                           | 1      |
| ≥ 480 ms ao 4º minuto de recuperação da prova de esforço          | 1      |
|                                                                   | 2      |
| b) <i>Torsade de pointes</i>                                      | 1      |
| c) Alternância da onda T                                          | 1      |
| d) Onda T entalhada em 3 derivações                               | 0,5    |
| e) FC baixa para a idade†                                         |        |
| <b>II. História clínica</b>                                       |        |
| a) Síncopes‡                                                      |        |
| com <i>stress</i>                                                 | 2      |
| sem <i>stress</i>                                                 | 1      |
| b) Surdez congénita                                               | 0,5    |
| <b>III. História familiar</b>                                     |        |
| a) Familiar com diagnóstico definitivo de SQT <sup>#</sup>        | 1      |
| b) MS inexplicada < 30 anos em familiares de 1º grau <sup>#</sup> | 0,5    |
| <b>SCORE</b>                                                      |        |
| ▪ Baixa probabilidade de SQT <sup>L</sup>                         | ≤ 1    |
| ▪ Probabilidade intermédia de SQT <sup>L</sup>                    | 1,5-3  |
| ▪ Alta probabilidade de SQT <sup>L</sup>                          | ≥ 3,5  |

\*na ausência de fármacos ou condições associadas a prolongamento do QTc; § QTc calculado pela fórmula de Bazett ( $QTc = QT / \sqrt{RR}$ ); † - mutuamente exclusivo; ‡ frequência cardíaca em repouso < 2º percentil para a idade. # - o mesmo membro da

família não pode ser contabilizado nos dois critérios; \*\* de acordo com Priori S.G et al(9) um intervalo QTc  $\geq 480$  ms, em ECGs de 12 derivações repetidos, na ausência de causas secundárias, é suficiente para o diagnóstico de SQTl. FC - frequência cardíaca; MS - morte súbita; SQTl - síndrome do QT longo.



## SUPLEMENTO 7. Manifestações cardíacas e extra-cardíacas de fenocópias da miocardiopatia hipertrófica.

Na miocardiopatia hipertrófica, antes do teste genético, deve ser avaliada a presença de manifestações específicas cardíacas e extra-cardíacas, que podem orientar o diagnóstico molecular: 1) doença de Anderson-Fabry - córnea *verticilata*, acroparestesias, hipohidrose, angioqueratomas, insuficiência renal/ proteinúria, doseamento da alfa-galactosidase A nos leucócitos; 2) doenças mitocondriais (dificuldades na aprendizagem, atraso mental, surdez, alterações visuais, ptose palpebral, fraqueza muscular, doseamento de lactato, mioglobínúria, CK, transaminases, biópsia muscular (cardíaca ou não); 3) amiloidose (neuropatia periférica e autonômica, síndrome do túnel cárpico bilateral, insuficiência renal/ proteinúria, púrpura particularmente periorbitária, achados particulares no ECG, ecocardiograma ou ressonância magnética, imunofixação das proteínas do plasma e urina, cadeias leves livres no soro, cintigrafia com  $^{99m}\text{Tc}$ -DPD (no caso de amiloidose por transtirretina), diagnóstico histológico (aspirado da gordura abdominal ou biópsia do órgão aparentemente afetado); 4) doença de Danon (dificuldades na aprendizagem, atraso mental, retinite pigmentosa, ECG com pré-excitação ventricular/bloqueio aurículo-ventricular, hipertrofia ventricular esquerda concêntrica massiva no ecocardiograma, aumento da CK e transaminases). (78)

## SUPLEMENTO 8. Diagnóstico de miocardiopatia dilatada em familiares.

Tabela S4. Critérios de diagnóstico de miocardiopatia dilatada em familiares.(24)

|                        |                                                                                                                                                                                                                                                                                                                                                                                                                                                                                                                         |
|------------------------|-------------------------------------------------------------------------------------------------------------------------------------------------------------------------------------------------------------------------------------------------------------------------------------------------------------------------------------------------------------------------------------------------------------------------------------------------------------------------------------------------------------------------|
| Doença provável        | 1 critério <i>major</i> + $\geq 1$ critério <i>minor</i> ou<br>1 critério <i>major</i> + variante genética causal                                                                                                                                                                                                                                                                                                                                                                                                       |
| Doença possível        | 1 critério <i>major</i> ou<br>2 critérios <i>minor</i> ou<br>1 critério <i>minor</i> + variante genética causal                                                                                                                                                                                                                                                                                                                                                                                                         |
| Critérios <i>major</i> | 1. Redução inexplicada da fração de ejeção do ventrículo esquerdo ( $45\% < FEVE \leq 50\%$ )<br>2. Dilatação inexplicada do ventrículo esquerdo, de acordo com nomogramas (diâmetro/volume VETD $> 2 DP + 5\%$ )                                                                                                                                                                                                                                                                                                       |
| Critérios <i>minor</i> | 1. BCRE ou BAV<br>2. Arritmias ventriculares inexplicadas ( $> 100$ extrassístoles ventriculares/h durante 24h ou TVNS, definida como $\geq 3$ batimentos com frequência $\geq 120$ bpm)<br>3. Alteração motilidade segmentar do ventrículo esquerdo na ausência de perturbação da condução intraventricular<br>4. Realce tardio de padrão não-isquêmico na RMC<br>5. Evidência de inflamação ou necrose/fibrose (não isquêmica) na biópsia endomiocárdica<br>6. Presença de auto anticorpos anti-cardíacos específicos |

BAV - bloqueio auriculo-ventricular; BCRE - bloqueio completo de ramo esquerdo; DP - desvio-padrão; FEVE - fração de ejeção do ventrículo esquerdo; RMC - ressonância magnética cardíaca; TVNS - taquicardia ventricular não-sustentada; VETD - ventrículo esquerdo em telediástole.

## SUPLEMENTO 9. Manifestações sugestivas de doença genética/rara na miocardiopatia dilatada.

Em todos os casos de miocardiopatia dilatada, antes do teste genético deve ser avaliada a presença de algumas manifestações sugestivas de doença genética/rara, que podem orientar o diagnóstico molecular(24), nomeadamente: 1) na avaliação clínica - atraso mental, surdez neurossensorial, hipovisão/cataratas, ptose palpebral, dificuldade marcha/fraqueza muscular, miotonia, hiperpigmentação da pele/cicatrices, queratoderma palmo-plantar e cabelo encaracolado; 2) alterações analíticas - alteração da função renal ou hepática, CK, saturação da transferrina/ferritina, hemograma, presença de proteinúria, alterações do metabolismo fosfo-cálcico ou da função tireóidea; 3) alterações no ECG - bloqueio auriculo-ventricular, onda P de baixa amplitude, paralisia auricular, padrão de “enfarte” pósterio-lateral, QRS de (muito) baixa amplitude ± bloqueio de ramo direito atípico; 4) alterações ecocardiográficas - discinésia/acinesia pósterio-lateral do ventrículo esquerdo.(78)

## SUPLEMENTO 10. Diagnóstico de miocardiopatia arritmogénica do ventrículo direito.

Tabela S5. Critérios de diagnóstico de miocardiopatia arritmogénica do ventrículo direito. (32)

|                                                       |                                                                                                                                                                                                                                                                                                                                                                                                                                                                                                                                                                                                                                                                                                                                                                                                                                                                                                                                                             |
|-------------------------------------------------------|-------------------------------------------------------------------------------------------------------------------------------------------------------------------------------------------------------------------------------------------------------------------------------------------------------------------------------------------------------------------------------------------------------------------------------------------------------------------------------------------------------------------------------------------------------------------------------------------------------------------------------------------------------------------------------------------------------------------------------------------------------------------------------------------------------------------------------------------------------------------------------------------------------------------------------------------------------------|
| Diagnóstico definitivo                                | 2 critérios <i>major</i> ou<br>1 critério <i>major</i> + 2 critérios <i>minor</i> ou<br>4 critérios <i>minor</i> de diferentes categorias                                                                                                                                                                                                                                                                                                                                                                                                                                                                                                                                                                                                                                                                                                                                                                                                                   |
| Diagnóstico provável                                  | 1 critério <i>major</i> + 1 critério <i>minor</i> ou<br>3 critérios <i>minor</i> de diferentes categorias                                                                                                                                                                                                                                                                                                                                                                                                                                                                                                                                                                                                                                                                                                                                                                                                                                                   |
| Diagnóstico possível                                  | 1 critério <i>major</i> ou<br>2 critérios <i>minor</i> de diferentes categorias                                                                                                                                                                                                                                                                                                                                                                                                                                                                                                                                                                                                                                                                                                                                                                                                                                                                             |
| DISFUNÇÃO REGIONAL OU GLOBAL / ALTERAÇÕES ESTRUTURAIS |                                                                                                                                                                                                                                                                                                                                                                                                                                                                                                                                                                                                                                                                                                                                                                                                                                                                                                                                                             |
| Critérios <i>major</i>                                | <u>Ecocardiograma transtorácico</u> <ul style="list-style-type: none"> <li>▪ Acinésia ou discinésia regional ou aneurisma do VD</li> <li>▪ e um dos seguintes (em telediástole): <ul style="list-style-type: none"> <li>- CSVD PEEL <math>\geq 32</math> mm (19 mm/m<sup>2</sup>)</li> <li>- CSVD PEEC <math>\geq 36</math> mm (21 mm/m<sup>2</sup>)</li> <li>- ou <math>\Delta</math> área fracional <math>\leq 33\%</math></li> </ul> </li> </ul> <u>Ressonância magnética cardíaca</u> <ul style="list-style-type: none"> <li>▪ Acinésia ou discinésia regional do VD ou dessincronia</li> <li>▪ e um dos seguintes: <ul style="list-style-type: none"> <li>- VTD VD <math>\geq 110</math> mL/m<sup>2</sup> (♂) ou <math>\geq 100</math> mL/m<sup>2</sup> (♀)</li> <li>- ou FEVD <math>\leq 40\%</math></li> </ul> </li> </ul> <u>Angiografia</u> <ul style="list-style-type: none"> <li>▪ Acinésia ou discinésia regional ou aneurisma do VD</li> </ul> |
| Critérios <i>minor</i>                                | <u>Ecocardiograma transtorácico</u> <ul style="list-style-type: none"> <li>▪ Acinésia ou discinésia regional do VD</li> <li>▪ e um dos seguintes (em telediástole): <ul style="list-style-type: none"> <li>- CSVD PEEL <math>\geq 29</math> e <math>&lt; 32</math> mm (<math>\geq 16</math> e <math>&lt; 19</math> mm/m<sup>2</sup>)</li> <li>- CSVD PEEC <math>\geq 32</math> e <math>&lt; 36</math> mm (<math>\geq 18</math> e <math>&lt; 21</math> mm/m<sup>2</sup>)</li> <li>- ou <math>\Delta</math> área fracional <math>&gt; 33\%</math> e <math>\leq 40\%</math></li> </ul> </li> </ul>                                                                                                                                                                                                                                                                                                                                                             |

|                                                |                                                                                                                                                                                                                                                                                                                                                                                                                                                                                                                                               |
|------------------------------------------------|-----------------------------------------------------------------------------------------------------------------------------------------------------------------------------------------------------------------------------------------------------------------------------------------------------------------------------------------------------------------------------------------------------------------------------------------------------------------------------------------------------------------------------------------------|
|                                                | <p><u>Ressonância magnética cardíaca</u></p> <ul style="list-style-type: none"> <li>▪ Acinésia ou discinésia regional do VD ou dessincronia</li> <li>▪ e um dos seguintes: <ul style="list-style-type: none"> <li>- VTD VD <math>\geq 100</math> e <math>&lt; 110</math> mL/m<sup>2</sup> (♂) ou <math>\geq 90</math> e <math>&lt; 100</math> mL/m<sup>2</sup> (♀)</li> <li>- ou FEVD <math>&gt; 40\%</math> e <math>\leq 45\%</math></li> </ul> </li> </ul>                                                                                  |
| <b>CARACTERIZAÇÃO TECIDULAR</b>                |                                                                                                                                                                                                                                                                                                                                                                                                                                                                                                                                               |
| <b>Critérios major</b>                         | <ul style="list-style-type: none"> <li>▪ Substituição do miocárdio do VD por fibroblastos (<math>&lt; 60\%</math> de miócitos residuais por análise morfométrica ou <math>&lt; 50\%</math> se estimativa), com ou sem substituição por tecido adiposo, numa ou mais amostras, de BEM.</li> </ul>                                                                                                                                                                                                                                              |
| <b>Critérios minor</b>                         | <ul style="list-style-type: none"> <li>▪ Substituição do miocárdio do VD por fibroblastos (60%-75% de miócitos residuais por análise morfométrica, ou 50%-65% se estimativa), com ou sem substituição por tecido adiposo, numa ou mais amostras, de BEM.</li> </ul>                                                                                                                                                                                                                                                                           |
| <b>ALTERAÇÕES DA REPOLARIZAÇÃO</b>             |                                                                                                                                                                                                                                                                                                                                                                                                                                                                                                                                               |
| <b>Critérios major</b>                         | <ul style="list-style-type: none"> <li>▪ Ondas T invertidas nas derivações pré-cordiais direitas (V1, V2 e V3), ou para além destas, em pessoas <math>&gt; 14</math> anos, na ausência de BCRD (QRS <math>\geq 120</math> ms).</li> </ul>                                                                                                                                                                                                                                                                                                     |
| <b>Critérios minor</b>                         | <ul style="list-style-type: none"> <li>▪ Ondas T invertidas nas derivações V1 e V2 em pessoas <math>&gt; 14</math> anos, na ausência de BCRD, ou em V4, V5 ou V6.</li> <li>▪ Ondas T invertidas em V1, V2, V3 e V4 em pessoas <math>&gt; 14</math> anos, na presença de BCRD.</li> </ul>                                                                                                                                                                                                                                                      |
| <b>ALTERAÇÕES DA DESPOLARIZAÇÃO / CONDUÇÃO</b> |                                                                                                                                                                                                                                                                                                                                                                                                                                                                                                                                               |
| <b>Critérios major</b>                         | <ul style="list-style-type: none"> <li>▪ Onda <i>epsilon</i> nas derivações pré-cordiais direitas (V1-V3)</li> </ul>                                                                                                                                                                                                                                                                                                                                                                                                                          |
| <b>Critérios minor</b>                         | <ul style="list-style-type: none"> <li>▪ Potenciais tardios em <math>\geq 1</math> de 3 parâmetros, na ausência de QRS <math>\geq 110</math> ms no ECG standard: <ul style="list-style-type: none"> <li>- Duração do QRS filtrado <math>\geq 114</math>ms</li> <li>- Duração da porção terminal do QRS <math>&lt; 40</math> <math>\mu</math>V (duração do sinal de baixa amplitude) <math>\geq 38</math> ms</li> <li>- Média da <i>J</i> da voltagem dos 40 ms terminais do QRS <math>\leq 20</math> <math>\mu</math>V</li> </ul> </li> </ul> |

|                        |                                                                                                                                                                                                                                                                                                                                         |
|------------------------|-----------------------------------------------------------------------------------------------------------------------------------------------------------------------------------------------------------------------------------------------------------------------------------------------------------------------------------------|
|                        | - Duração da ativação terminal do QRS $\geq 55$ ms, medida desde o <i>nadir</i> da onda S até ao fim do QRS, incluindo R', em V1, V2, ou V3, na ausência de BCRD                                                                                                                                                                        |
| ARRITMIAS              |                                                                                                                                                                                                                                                                                                                                         |
| <b>Critérios major</b> | <ul style="list-style-type: none"> <li>▪ TV sustentada ou não-sustentada com morfologia de BRE e eixo superior.</li> </ul>                                                                                                                                                                                                              |
| <b>Critérios minor</b> | <ul style="list-style-type: none"> <li>▪ TV sustentada ou não-sustentada da CSVD, morfologia de BRE e eixo inferior.</li> <li>▪ &gt;500 extrassístoles ventriculares em Holter de 24 horas.</li> </ul>                                                                                                                                  |
| HISTÓRIA FAMILIAR      |                                                                                                                                                                                                                                                                                                                                         |
| <b>Critérios major</b> | <ul style="list-style-type: none"> <li>▪ MAVD confirmada num familiar de 1º grau, por critérios clínicos ou patológicos (autópsia ou cirurgia).</li> <li>▪ Identificação de variante genética patogénica, associada ou provavelmente associada, no indivíduo em estudo.</li> </ul>                                                      |
| <b>Critérios minor</b> | <ul style="list-style-type: none"> <li>▪ História de MAVD num familiar de 1º grau, mas sem possibilidade de confirmação.</li> <li>▪ Morte súbita &lt; 35 anos, por MAVD suspeita, num familiar de 1º grau.</li> <li>▪ MAVD confirmada num familiar de 2º grau, por critérios clínicos ou patológicos (autópsia ou cirurgia).</li> </ul> |

BCRD - bloqueio completo de ramo direito; BEM - biópsia endomiocárdica; BRE - bloqueio de ramo esquerdo; CSVD - câmara de saída do ventrículo direito; FEVD - fração de ejeção do ventrículo direito; MAVD - miocardiopatia arritmogénica do ventrículo direito; PEEC - para-esternal eixo curto; PEEL - para-esternal eixo-longo; VD - ventrículo direito; VTD - volume telediastólico; ♀ - mulher; ♂ - homem.

## SUPLEMENTO 11. Diagnósticos diferenciais a considerar na miocardiopatia restritiva.

Na miocardiopatia restritiva, antes do estudo genético, devem ser considerados os seguintes diagnósticos diferenciais e testes diagnósticos: 1) amiloidose; 2) doença de Anderson-Fabry; 3) desminopatia (perturbação da condução aurículo-ventricular, fraqueza muscular, elevação da CK sérica); 4) esclerodermia; 5) fibrose endomiocárdica, síndrome hipereosinofílica, fibroelastose endocárdica (obliteração apical parcial do ventrículo esquerdo ou ventrículo direito, por ecocardiograma ou RMC); 6) hemocromatose (hiperpigmentação cutânea/cicatrizes, artralgias, hipogonadismo, diabetes, disfunção hepática, elevação da taxa de saturação da transferrina e ferritina sérica, achados característicos por RMC); 7) sarcoidose (com ou sem manifestações extra-cardíacas, doseamento da ECA plasmática, calcemia, calciúria de 24h, ressonância magnética cardíaca,  $^{18}\text{F}$ -FDG-PET); 8) síndrome carcinóide; 9) toxicidade por antraciclinas; 10) miocardiopatia secundária a radiação. (22, 78)

## SUPLEMENTO 12. Diagnóstico de não-compactação do ventrículo esquerdo.

**Tabela S6.** Critérios de diagnóstico de não-compactação do ventrículo esquerdo. (38-44)

| ECOCARDIOGRAFIA TRANSTORÁCICA                                                                                                                                                                                                                                                                                  |
|----------------------------------------------------------------------------------------------------------------------------------------------------------------------------------------------------------------------------------------------------------------------------------------------------------------|
| <p><b>Jenni et al (38)</b><br/> Fluxo dentro dos recessos inter-trabeculares; 2 camadas distintas; hipertrabeculação no ápex ou nos segmentos médios inferior ou lateral; sem outras anomalias e<br/> <i>Ratio</i> miocárdio não-compactado/compactado &gt;2:1 (em telessístole, para-esternal eixo curto)</p> |
| <p><b>Chin et al (39)</b><br/> (Distância epicárdio-vale da trabécula) / (distância epicárdio-pico da trabécula) <math>\leq</math> 0.5 (em telediástole, para-esternal eixo curto)</p>                                                                                                                         |
| <p><b>Stollberger et al (40, 41)</b><br/> 3 trabéculas, apicais aos músculos papilares, visíveis num plano e<br/> <i>Ratio</i> miocárdio não-compactado/compactado &gt;2 (em telediástole, apical 4-câmaras)</p>                                                                                               |
| <p><b>Gebhard et al (44)</b><br/> Espessura miocárdio compactado &lt; 8 mm em sístole</p>                                                                                                                                                                                                                      |
| RESSONÂNCIA MAGNÉTICA CARDIOVASCULAR                                                                                                                                                                                                                                                                           |
| <p><b>Petersen et al (42)</b><br/> <i>Ratio</i> miocárdio não-compactado/compactado &gt;2,3 (em telediástole, eixo longo)</p>                                                                                                                                                                                  |
| <p><b>Jacquier et al (43)</b><br/> Massa trabeculada do ventrículo esquerdo &gt; 20% do total da massa do ventrículo esquerdo (em telediástole, eixo curto)</p>                                                                                                                                                |



## SUPLEMENTO 13. Rastreio familiar nas miocardiopatias.

A avaliação fenotípica inicial está recomendada nos familiares de 1º grau (incluindo os assintomáticos) e inclui história clínica (com especial atenção para sintomas de insuficiência cardíaca, arritmias, síncope/pré-síncope e eventos tromboembólicos), exame físico (com enfoque nos sistemas cardiovascular e neurológico), eletrocardiograma e ecocardiograma e eventualmente Holter, em casos de perturbação da condução/arritmias.(23, 24, 31, 79)

A reavaliação periódica dos familiares de primeiro grau em risco está também recomendada, particularmente nos casos de miocardiopatias familiares.(24, 31, 79) O início e periodicidade destas avaliações (Tabela S7) dependem da miocardiopatia em causa e podem ser modulados por vários fatores, nomeadamente a idade de início, a gravidade das complicações dentro da família, prática do exercício físico intenso ou competitivo, gravidez, presença de sintomas ou outra suspeita clínica.(79) Uma vez identificado um novo caso de doença, o rastreio clínico deve ser alargado aos restantes elementos da família (cascata clínica).

As recomendações da *Heart Failure Society of America*, preconizam um início mais precoce do rastreio familiar, desde os primeiros anos de vida, e recomendam o rastreio durante toda a vida dos familiares de primeiro grau, com periodicidades variáveis, mediante a miocardiopatia em questão e a faixa etária.(23)

**Tabela S7.** Recomendações para o rastreio familiar dos doentes com miocardiopatias.(79)

|                                    | <b>MCH</b>                       | <b>MCD</b>                                           | <b>MAVD</b>                     | <b>MCR</b>                       | <b>NCVE</b>                                |
|------------------------------------|----------------------------------|------------------------------------------------------|---------------------------------|----------------------------------|--------------------------------------------|
| <b>Quando iniciar</b>              | 10-12 anos                       | Infância<br>(excepto<br>laminopatias:<br>10-12 anos) | 10-12 anos                      | 10-12<br>anos                    | Recém-<br>nascido                          |
| <b>Periodicidade da avaliação</b>  | Cada 3-5<br>anos, <10<br>anos    | Cada 1-3 anos,<br><10 anos <sup>a</sup>              | Cada 3-5<br>anos, <10<br>anos   | Cada 3-5<br>anos, <10<br>anos    | Cada 1-3<br>anos, <20<br>anos <sup>a</sup> |
|                                    | Cada 1-2<br>anos, 10-<br>20 anos | Cada 1-2 anos,<br>10-20 anos <sup>a</sup>            | Cada 1-2<br>anos, 10-20<br>anos | Cada 1-2<br>anos, 10-<br>20 anos | Cada 2-5<br>anos, >20<br>anos <sup>a</sup> |
|                                    | Cada 2-5<br>anos, >20<br>anos    | Cada 2-5 anos,<br>> 20 anos <sup>a</sup>             | Cada 2-5<br>anos, >20<br>anos   | Cada 2-5<br>anos, >20<br>anos    |                                            |
| <b>Quando terminar<sup>b</sup></b> | 50-60 anos                       | 50-60 anos                                           | 50-60 anos                      | 50-60<br>anos                    | 50-60<br>Anos                              |

a) A avaliação cardíaca seriada é mandatória no contexto familiar das MCD e NCVE, mas é questionável nas formas esporádicas, situações em que uma avaliação única durante a puberdade ou vida adulta poderá ser suficiente. b) Se houver desenvolvimento de sintomas poderá ser realizado avaliação cardíaca. MAVD - miocardiopatia arritmogénica do ventrículo direito; MCD - miocardiopatia dilatada; MCH - miocardiopatia hipertrófica; MCR - miocardiopatia restritiva; NCVE - não compactação do ventrículo esquerdo.

## SUPLEMENTO 14. Aortopatias hereditárias.

Tabela S8.1. Principais síndromes associadas a aneurisma e disseção da aorta.

| SÍNDROME           | CARACTERÍSTICAS CLÍNICAS<br>FREQUENTES                                                                                                                                                                                                                                                                                                                                                                                                                                                                                                                                                                                                                                                               | GENES                                                                                       | CRITÉRIOS DE<br>DIAGNÓSTICO                                | ENVOLVIMENTO AÓRTICO -<br>PARTICULARIDADES(49)                                                                                                                                                                                                                                                                                                        |
|--------------------|------------------------------------------------------------------------------------------------------------------------------------------------------------------------------------------------------------------------------------------------------------------------------------------------------------------------------------------------------------------------------------------------------------------------------------------------------------------------------------------------------------------------------------------------------------------------------------------------------------------------------------------------------------------------------------------------------|---------------------------------------------------------------------------------------------|------------------------------------------------------------|-------------------------------------------------------------------------------------------------------------------------------------------------------------------------------------------------------------------------------------------------------------------------------------------------------------------------------------------------------|
| <b>Marfan</b>      | <p>AD</p> <p>Envolvimento cardiovascular:</p> <ul style="list-style-type: none"> <li>- Aneurisma da aorta torácica e/ou dissecação</li> <li>- PVM, insuficiência mitral</li> <li>- Insuficiência aórtica</li> </ul> <p>Ocular:</p> <ul style="list-style-type: none"> <li>-<i>Ectopia lentis</i></li> <li>-Miopia</li> </ul> <p>Esquelético:</p> <ul style="list-style-type: none"> <li>- Anomalias do tecido conjuntivo (hiperlaxidez articular, hérnias recorrentes, estrias atroficas, ectasia dural)</li> <li>-Hipercrecimento dos ossos longos (dolicoostenomelia, aracnodactilia, cifoescoliose, deformidade do esterno)</li> <li>- Protusão do acetábulo</li> </ul> <p>Alterações faciais</p> | <p><i>FBN1</i></p> <p><i>TGFBR1</i> e</p> <p>2</p> <p><i>SMAD 3</i></p> <p><i>TGFB2</i></p> | <p>Crítérios de Ghent (80)</p> <p>Sequenciação de ADN*</p> | <p>- Terapêutica médica: bloqueadores-beta, inibidores dos receptores tipo-1 da angiotensina II (losartan)</p> <p>- Cirurgia de aneurisma da aorta a partir dos 5 cm ou antes se história familiar de disseção aórtica &lt;5 cm, aneurisma com rápida expansão (&lt;2mm/ano), insuficiência aórtica ou mitral significativa, desejo de engravidar</p> |
| <b>Loyes-Dietz</b> | <p>AD</p> <p>Tríade:</p> <ul style="list-style-type: none"> <li>-Tortuosidade/aneurismas</li> </ul>                                                                                                                                                                                                                                                                                                                                                                                                                                                                                                                                                                                                  | <p><i>TGFBR1</i></p> <p><i>TGFBR2</i></p> <p><i>SMAD3</i></p>                               | <p>Sequenciação de ADN*</p>                                | <p>-Doença vascular mais agressiva do que na Síndrome de Marfan</p>                                                                                                                                                                                                                                                                                   |

|                                       |                                                                                                                                                                                                                                                                                                                                                                                                                                                                                                |                                         |                                                                                 |                                                                                                                                                                                                                                                                                                               |
|---------------------------------------|------------------------------------------------------------------------------------------------------------------------------------------------------------------------------------------------------------------------------------------------------------------------------------------------------------------------------------------------------------------------------------------------------------------------------------------------------------------------------------------------|-----------------------------------------|---------------------------------------------------------------------------------|---------------------------------------------------------------------------------------------------------------------------------------------------------------------------------------------------------------------------------------------------------------------------------------------------------------|
|                                       | <p>arteriais (principalmente cabeça e pescoço)</p> <ul style="list-style-type: none"> <li>-Úvula bifida/fenda palatina</li> <li>-Hipertelorismo</li> </ul> <p>Outras características:</p> <ul style="list-style-type: none"> <li>- pele aveludada e translúcida</li> <li>- craniossinostose</li> <li>- hipoplasia malar, retrognatia, escleróticas azuladas</li> <li>- manifestações esqueléticas semelhantes ao SM, hiperlaxidez articular</li> <li>- anomalias da coluna cervical</li> </ul> | <p><i>TGFB2</i></p> <p><i>TGFB3</i></p> |                                                                                 | <p>-Pode manifestar-se na infância</p> <p>-Reparação cirúrgica se diâmetro aórtico <math>\geq 4,2</math> cm por ETE ou 4,4-4,6 cm por TC/RM (cirurgia habitualmente sem complicações)</p>                                                                                                                     |
| <b>Ehlers-Danlos (forma vascular)</b> | <p>AD</p> <ul style="list-style-type: none"> <li>-Rutura de artérias de médio e grande calibre</li> <li>-Rutura de útero gravídico</li> <li>-Rutura gastro-intestinal (antes das ruturas arteriais)</li> <li>-Pele fina e translúcida, equimoses fáceis, envelhecimento cutâneo prematuro</li> <li>- Características faciais</li> </ul>                                                                                                                                                        | <i>COL3A1</i>                           | <p>Sequenciação de ADN</p> <p>Análise do colagénio tipo III em fibroblastos</p> | <p>- A ocorrência de ruturas ou dissecções, múltiplas ou recorrentes, em diferentes localizações, em idades inferiores a 40 anos, deve levantar esta hipótese de diagnóstico.</p> <p>- A dissecção arterial pode ocorrer sem dilatação prévia.</p> <p>- Tecidos friáveis complicam a reparação cirúrgica.</p> |
| <b>Turner</b>                         | <p>Monossomia (45,X)</p> <ul style="list-style-type: none"> <li>-Válvula aórtica bicúspide</li> <li>-Coartação aórtica</li> </ul>                                                                                                                                                                                                                                                                                                                                                              | <p>Cariótipo</p> <p>45X</p>             | Cariótipo                                                                       | <p>- Risco de dissecção aórtica aumentado se existir bicuspidia ou</p>                                                                                                                                                                                                                                        |

|                  |                                                                                                                       |                                            |                     |                                             |
|------------------|-----------------------------------------------------------------------------------------------------------------------|--------------------------------------------|---------------------|---------------------------------------------|
|                  | -Baixa estatura<br>-Amenorreia primária<br>-Alterações metabólicas<br>-Pescoço curto<br>-Orelhas de implantação baixa |                                            |                     | coartação aórtica, hipertensão ou gravidez. |
| Outras Síndromes | Disfunção multissistémica do músculo liso                                                                             | <i>ACTA2</i>                               | Sequenciação de ADN |                                             |
|                  | Shprintzen-Goldberg                                                                                                   | <i>SKI</i>                                 |                     |                                             |
|                  | Tortuosidade arterial (AR)                                                                                            | <i>SLC2A 10</i>                            |                     |                                             |
|                  | <i>Cutis Laxa</i> (AD ou AR)                                                                                          | <i>ELN</i><br><i>FBLN4</i><br><i>FBLN5</i> |                     |                                             |
|                  | Aneurismas-osteoartrose (AD)                                                                                          | <i>SMAD3</i>                               |                     |                                             |

AD - autossómico dominante; AR - autossómico recessivo; ETE - ecocardiograma transesofágico; PVM - prolapso da válvula mitral; RM - ressonância magnética; SM - síndrome de Marfan; TC - tomografia computadorizada. \* Sequenciação de ADN: gene-específico ou em painéis genéticos.

Tabela S8.2. Formas não sindrômicas associadas a aneurisma e disseção da aorta.

| FORMAS NÃO SINDRÔMICAS                                                     | ASSOCIAÇÕES FREQUENTES                                                                                                                                                                                                                  | GENES                                                                                                                                                                        | CRITÉRIOS DE DIAGNÓSTICO                                            | ENVOLVIMENTO AÓRTICO - PARTICULARIDADES(49)                                        |
|----------------------------------------------------------------------------|-----------------------------------------------------------------------------------------------------------------------------------------------------------------------------------------------------------------------------------------|------------------------------------------------------------------------------------------------------------------------------------------------------------------------------|---------------------------------------------------------------------|------------------------------------------------------------------------------------|
| <b>Aneurismas/ disseção aórtica familiares</b>                             | AD<br><br>Possíveis associações:<br>- <i>Livedo reticularis</i><br>- Patência do canal arterial<br>- Aneurismas intracranianos<br>- Bicuspidia aórtica<br>- Prolapso mitral<br>- Iris flocculi<br>- Doença cerebrovascular ou coronária | <i>ACTA2</i><br><i>TGFBR1</i><br><i>FBN1</i><br><i>MYLK</i><br><i>SMAD3</i><br><i>NOTCH1</i><br><i>PRKG1</i><br><i>MYH11</i><br><i>TGFB2</i><br><i>MAT2A</i><br><i>MFAP5</i> | Sequenciação de ADN* (% de casos com variantes patogénicas: 15-20%) | - Disseção aórtica pode ocorrer < 5 cm<br><br>- Está indicado o rastreio familiar. |
| <b>Outras situações genéticas com risco acrescido de aneurisma aórtico</b> | - Ehlers-Danlos tipo clássico<br>- Síndrome de Beals<br>- Doença poliquística renal AD<br>- Síndrome de Noonan<br>- Síndrome de Alagille, etc.                                                                                          |                                                                                                                                                                              | Sequenciação de ADN                                                 |                                                                                    |

AD - autossômico dominante; \* Sequenciação de ADN: gene-específico ou em painéis genéticos.

**Tabela S8.3. Indicações para a avaliação imagiológica da aorta.(49)**

|                                                              |                                                                                                                                                                                                                                                                                                                                                                                                                   |
|--------------------------------------------------------------|-------------------------------------------------------------------------------------------------------------------------------------------------------------------------------------------------------------------------------------------------------------------------------------------------------------------------------------------------------------------------------------------------------------------|
| <b>Síndrome de Marfan</b>                                    | <ul style="list-style-type: none"> <li>▪ ETT no momento do diagnóstico (para avaliação da raiz da aorta e aorta ascendente) e a cada 6 meses para controlo da taxa de progressão da dilatação.</li> <li>▪ Se taxa de progressão estável: avaliação ecocardiográfica anual (ou mais frequente, se diâmetro <math>\geq 4,5</math> cm)</li> </ul>                                                                    |
| <b>Síndrome de Loyes-Dietz</b>                               | <ul style="list-style-type: none"> <li>▪ Avaliação imagiológica de toda a aorta no momento do diagnóstico e a cada 6 meses, para controlo da taxa de progressão da dilatação aórtica.</li> <li>▪ Avaliação anual por RM da circulação cerebral e pélvica.</li> </ul>                                                                                                                                              |
| <b>Síndrome de Turner</b>                                    | <ul style="list-style-type: none"> <li>▪ Avaliação imagiológica cardíaca e aórtica para diagnóstico de bicuspidia, coartação e/ou dilatação aórtica.</li> <li>▪ Se a avaliação inicial não mostrar alterações, a avaliação imagiológica deve ser repetida a cada 3-5 anos ou antes, se indicação clínica.</li> <li>▪ Se houver anomalias na avaliação inicial, a avaliação imagiológica deve ser anual</li> </ul> |
| <b>Síndrome de Ehlers-Danlos (tipo vascular)</b>             | <ul style="list-style-type: none"> <li>▪ Avaliação imagiológica não-invasiva é recomendada</li> </ul>                                                                                                                                                                                                                                                                                                             |
| <b>Aneurismas e dissecções da aorta torácica, familiares</b> | <ul style="list-style-type: none"> <li>▪ A avaliação imagiológica da aorta é recomendada para os familiares em primeiro grau de doentes com aneurisma e/ou disseção da aorta torácica, para identificar indivíduos assintomáticos com patologia aórtica.</li> </ul>                                                                                                                                               |

ETT - ecocardiograma transtorácico; RM - ressonância magnética.

## SUPLEMENTO 15. Cardiopatias congénitas.

São vários os fatores etiológicos das cardiopatias congénitas (CC): fatores ambientais, doenças maternas crónicas (diabetes, fenilcetonúria, lúpus), infeções maternas (rubéola), exposição pré-natal a álcool ou fármacos (antiepiléticos, varfarina, lítio etc.), anomalias cromossómicas numéricas/aneuploidias (monossomias -Turner, trissomias -13, 18, 21) ou estruturais (deleção 22q11.2 - S. diGeorge; deleção 7q11.23 - S. Williams, etc.) e síndromes monogénicas (com atraso mental - S. Rubenstein-Taybi, S. Cornelia de Lange, S. de Smith-Lemli-Opitz etc.; com alterações nos membros - S. de Holt Oram, VACTERL etc.; com baixa estatura - S. e Noonan, S. de Ellis van Creveld, etc.). Como os fatores genéticos estão envolvidos na maioria dos casos, é sempre importante a avaliação por um geneticista para o diagnóstico e aconselhamento genético (risco de recorrência, diagnóstico pré-natal). (81-83)(84)

A abordagem ao diagnóstico genético das CC é variável e pode incluir: cariótipo (ex. trissomia 21), hibridização genómica comparativa com *arrays* (ex. anomalias congénitas múltiplas, sem diagnóstico de síndrome específica), hibridização fluorescente *in situ* (ex. suspeita de deleção 22q11.2), sequenciação de painéis genéticos específicos, quando há suspeita de doença monogénica. A variedade de genes, a sua frequência relativa (algumas variantes ultra-raras) e o carácter oligogénico e multifatorial de muitas das CC, pode também justificar o recurso à sequenciação do exoma/genoma. (85).

Na Tabela S9.1 encontram-se alguns exemplo de CC sindrómicas frequentes e nas tabelas S9.2 e S9.3 apresentam-se alguns dados sobre o risco de recorrência de algumas CC.



Tabela S9.1. Exemplos de cardiopatias congénitas associadas a síndromes frequentes.(85)

| SÍNDROME                             | CARDIOPATIA CONGÉNITA                                                                                                                                                                                                          | OUTRAS ALTERAÇÕES                                                                                                                                                                                                                  |
|--------------------------------------|--------------------------------------------------------------------------------------------------------------------------------------------------------------------------------------------------------------------------------|------------------------------------------------------------------------------------------------------------------------------------------------------------------------------------------------------------------------------------|
| Trissomia 21<br>(Síndrome de Down)   | CC presente em 40-50% dos casos, sendo as mais frequentes os defeitos auriculo-ventriculares, comunicações interventriculares e interauriculares; Tetralogia de Fallot e d-transposição das grandes artérias menos frequentes. | Face característica, baixa estatura, hipotonia, hiperextensibilidade, perturbação variável do desenvolvimento intelectual, risco aumentado de doença de Alzheimer.                                                                 |
| Monossomia X<br>(Síndrome de Turner) | CC presente em cerca de 30% dos casos. Coartação da aorta, válvula aórtica bicúspide, estenose aórtica, dilatação raiz da aorta que pode evoluir para disseção ou rotura.                                                      | Baixa estatura, infertilidade, linfedema das mãos e dos pés, pescoço "alado", anomalias esqueléticas e renais.                                                                                                                     |
| Síndrome de deleção<br>22q11.2*      | CC presente em cerca de 75% dos casos. Tetralogia de Fallot (20%), <i>truncus arteriosus</i> , defeito do septo ventricular conoventricular, anomalia isolada do arco aórtico, interrupção do arco aórtico de tipo B.          | Dismorfismo facial (que pode ser subtil), malformações do palato, perturbação do desenvolvimento intelectual, imunodeficiência, hipocalcemia, doença psiquiátrica.                                                                 |
| Síndrome de deleção<br>7q11.23†      | CC presente em 50-85% dos casos. Estenose supravalvular aórtica ou pulmonar, estenoses pulmonares periféricas, mas qualquer artéria pode estar estenosada.                                                                     | Face característica: bochechas proeminentes, boca grande, lábios grossos, olhos azuis com a íris estrelada. Anomalias esqueléticas e renais, hipercalcemia infantil, hipercalcúria, alterações endócrinas, personalidade "social". |
| Síndrome de Noonan§(86)              | Estenose valvular pulmonar (40-50%, frequentemente com válvulas displásicas), MCH (20%), coartação aorta, comunicação interauricular, defeitos válvula mitral, tetralogia de Fallot, anomalias arteriais.                      | Baixa estatura, pescoço curto e largo, hipertelorismo, ptose palpebral, implantação baixa das orelhas, escoliose, lordose, pectus excavatum, criptorquidia e alterações cognitivas.                                                |
| Síndrome de Holt Oram‡               | Defeitos septais, anomalia de condução cardíaca.                                                                                                                                                                               | Defeitos dos membros, do eixo radial (ex. ausência do polegar). Sem perturbação do desenvolvimento                                                                                                                                 |

|  |  |              |
|--|--|--------------|
|  |  | intelectual. |
|--|--|--------------|

\*Microdeleção no cromossoma 22; pode ser transmitido num padrão autossômico dominante em 20% dos casos. Várias designações (CATCH 22, Síndrome de Sprintzen, Síndrome velocardiofacial, Síndrome de DiGeorge). †Microdeleção no cromossoma 7 que inclui o gene da elastina (*ELN*). Também designado por Síndrome de Williams-Bauren. §Síndrome autossômico dominante; múltiplos genes, todos da via RAS-MAPK (as situações determinadas por estes genes são designadas por Rasopatias). ‡Mutação no gene *TBX5*. CC - cardiopatia congénita; MCH - miocardiopatia hipertrófica.

**Tabela S9.2.** Risco de recorrência de uma cardiopatia específica (para os irmãos de um caso índice).(87, 88)(89)

| CARDIOPATIA CONGÉNITA            | Risco (%) |
|----------------------------------|-----------|
| Comunicação interventricular     | 3         |
| Comunicação interauricular       | 2,5-3     |
| Persistência do canal arterial   | 3         |
| Tetralogia de Fallot             | 2,5-3     |
| Defeito septal atrioventricular  | 3-4       |
| Estenose pulmonar                | 2         |
| Estenose aórtica                 | 2         |
| Coartação da aorta               | 2         |
| Transposição de grandes artérias | 2-9       |
| Ventrículo esquerdo hipoplásico  | 3         |
| Atrésia pulmonar*                | 1         |
| <i>Truncus arteriosus</i>        | 1         |
| Atrésia da tricúspide*           | 1         |
| Anomalia de Ebstein*             | 1         |

\*Risco baseado num número muito limitado de casos

**Tabela S9.3.** Risco de recorrência de uma cardiopatia congênita não específica. (88)

| Familiares afetados                              | Risco (%) |
|--------------------------------------------------|-----------|
| Incidência populacional                          | 0,5       |
| Filhos de um caso isolado:                       |           |
| Pai                                              | 1,5-3,5   |
| Mãe                                              | 3,5-18    |
| Dois irmãos afetados (ou um dos pais e um irmão) | 3-10      |
| >2 familiares em primeiro grau                   | ~50       |
